# The Role of Vitamin D in Suppressing Cytokine Storm and Associated Mortality in COVID-19 Patients

The authors have withdrawn this manuscript because they have noticed idiosyncrasies in the reporting of 25(OH)D data across different countries. Therefore, the authors do not wish this work to be cited until after this issue is addressed. If you have any questions, please contact the corresponding author.

Ali Daneshkhah, Adam Eshein, Hariharan Subramanian, Hemant K. Roy, and Vadim Backman
